# Supplementary material for: Freshwater trematodes differ from marine trematodes in patterns connected with division of labor
Source: PeerJ journal article supplement (doi:10.7717/peerj.17211), 2024-04-12
Supplement: Supp6_DOL.pdf [file Supp6_DOL.pdf]

**Supplementary File 6:** representative photos of cercariae and rediae from each genetic group. If the genetic group includes trematodes from multiple infected snails, all snail numbers are listed in parentheses following the group number. For groups with many representatives, the snail number(s) from which photos were obtained are **bolded**. Scale bars are all 100µm.

| Group                                                                                | Cercaria                                                                            | Smaller Redia                                                                        | Larger Redia                                                                          |
|--------------------------------------------------------------------------------------|-------------------------------------------------------------------------------------|--------------------------------------------------------------------------------------|---------------------------------------------------------------------------------------|
| H070<br>(H070, 110)                                                                  |    |    |    |
| H102                                                                                 |   |   |   |
| H104<br>(cercaria has finfold on tail; large redia are all slightly pinched/damaged) |  |  |  |
| H107<br>(cercaria encysted before photo was taken; detached tail visible)            |  |  |  |

|                                                                                                                                          |                                                                                     |                                                                                      |                                                                                       |
|------------------------------------------------------------------------------------------------------------------------------------------|-------------------------------------------------------------------------------------|--------------------------------------------------------------------------------------|---------------------------------------------------------------------------------------|
| H127<br>(cercaria encysted before photo could be taken)                                                                                  |    |    |    |
| P107<br>( <b>P107</b> ,<br>P152)                                                                                                         |    |    |    |
| P112<br>(P119,<br>P121, P122,<br>P125, P126,<br>P128, P131,<br><b>P137</b> , P154,<br>P155, P160,<br>P162, P163,<br>P164, P165,<br>P170) |   |   |   |
| P113<br>(P113,<br><b>P120</b> , P130,<br><b>P136</b> , P157,<br>P166)                                                                    |  |  |  |
| P115<br>(P115,<br>P116, P117,<br><b>P140</b> ,<br>Ph126)                                                                                 |  |  |  |

|                                                        |                                                                                     |                                                                                      |                                                                                       |
|--------------------------------------------------------|-------------------------------------------------------------------------------------|--------------------------------------------------------------------------------------|---------------------------------------------------------------------------------------|
| P141                                                   |    |    |    |
| P150                                                   |    |    |    |
| P153                                                   |   |   |   |
| P177<br>(P177,<br>P178)                                |  |  |  |
| Ph095<br>(Ph095,<br><b>Ph107</b> ,<br>Ph109,<br>Ph112) |  |  |  |

|                                                       |                                                                                     |                                                                                      |                                                                                       |
|-------------------------------------------------------|-------------------------------------------------------------------------------------|--------------------------------------------------------------------------------------|---------------------------------------------------------------------------------------|
| Ph096                                                 |    |    |    |
| Ph100                                                 |    |    |    |
| Ph116                                                 |   |   |   |
| Ph159                                                 |  |  |  |
| V141<br>(V141,<br>V159, V168,<br>V182, V183,<br>V184) |  |  |  |

|                                                     |                                                                                     |                                                                                      |                                                                                       |
|-----------------------------------------------------|-------------------------------------------------------------------------------------|--------------------------------------------------------------------------------------|---------------------------------------------------------------------------------------|
| V172                                                | (cercariae not observed before dissection; rediae were discovered after dissection) | (haphazard sample not taken; small may have been missed)                             |    |
| Unk: H148                                           |    |    |    |
| Unk: H158                                           |   |   |   |
| Unk: H096<br>(encysted before photo could be taken) |  |  |  |
| Unk: P135                                           |  |  |  |

|            |                                                                                   |                                                                                    |                                                                                     |
|------------|-----------------------------------------------------------------------------------|------------------------------------------------------------------------------------|-------------------------------------------------------------------------------------|
| Unk: P139  |  |  |  |
| Unk: Ph115 |  |  |  |
