# Supplementary material for: Freshwater trematodes differ from marine trematodes in patterns connected with division of labor
Source: PeerJ. 2024 Apr 12;12:e17211. doi: 10.7717/peerj.17211 (PMC11017974; doi:10.7717/peerj.17211)
Supplement: Supplemental Information 4 — This Excel document lists the actual output from statistical tests, etc., for each colony. An explanation of column headings is available in File S5. [file peerj-12-17211-s004.xlsx]

## Sheet: Sheet1
sample	group	GenBank	notes	coll.date	coll.location	dissect.medium	vol.N	vol.SW.p	vol.hist.bimod	vol.hist.break	repr.sm5	app.ant.sm.median	app.ant.lg.median	app.ant.p	app.post.sm.median	app.post.lg.median	app.post.p	phar.N.lg	phar.N.sm	phar.rel.median.big	phar.rel.median.sm	phar.rel.p	phar.abs.median.big	phar.abs.median.sm	phar.abs.p	sm.n.small	sm.n.big	sm.prop.small	dist.gonad.n	dist.GonadMid.n	dist.mid.n	dist.midFoot.n	dist.foot.n	dist.general.n	dist.gonad.p.small	dist.GonadMid.p.small	dist.midp.small	dist.midFoot.p.small	dist.foot.p.small	dist.general.p.small	dist.summary	dist.CIsummary	act.abs.sm.med	act.abs.lg.med	act.abs.p	act.rel.sm.med	act.rel.lg.med	act.rel.p	att.lg
H101	H101	OR666888	excluded due to issues with photo labeling	20190617	SP	w	17
H102	H102	OR666889		20190701	TP	w	17	0.280157			4	2	0	0.135172	0	0	0.300236	1	0	NA	NA	NA	NA	NA	NA	0	0	NA	5	0	3	0	0	0	0.8	NaN	0	NaN	NaN	NaN	N	CI overlap
H104	H104	OR666890		20190701	TP	w	22	0.0780992			4	0	0	0.211855	0	0	1	2	0	NA	NA	NA	NA	NA	NA	0	0	NA	0	0	12	0	0	0	NaN	NaN	0.5	NaN	NaN	NaN	NA	NA							0
H107	H107	OR666891		20190708	SP	w	43	0.000609752	Y	6.2-6.4	3	0	0	1	0	0	0.783945	10	14	0.00296651	0.034728	4.07902e-06	46157.6	22449.3	8.1384e-05	22	20	0.52381	21	0	7	0	0	14	0.428571	NaN	0.857143	NaN	NaN	0.5	Y	CI overlap
H109	unk		very few rediae and none with reliable measurements
H110	H070	OR666892		20190708	SP	w	25	0.0511625			2	0	0	1	3	3	0.585869	6	3	0.00174973	0.018011	0.0238095	73622.2	26521.8	0.0249683	0	0	NA	6	0	6	0	0	0	0.166667	NaN	0.833333	NaN	NaN	NaN	Y	CI overlap
H127	H127	OR666893		20190708	SP	w	31	0.001409	Y	6-6.5	2	0	0	1	0	0	0.950528	10	5	0.00333749	0.0357851	0.000666001	57905.8	22449.3	0.00260047	15	15	0.5	14	0	7	0	0	9	0.428571	NaN	0.714286	NaN	NaN	0.444444	Y	CI overlap
H148	unk			20190708	SP	w	28	0.00325506	Y	6.5-7	2	0	0	1	0	0	1	10	7	0.00422446	0.0389219	0.000102838	67452.9	24429	0.000743374	14	11	0.56	0	0	0	0	0	25	NaN	NaN	NaN	NaN	NaN	0.56	NA
H156	H156	OR666894	excluded due to issues with photo labeling	20190729	SP	w	13	0.054422			2	0	0	1	0	0	1	0	1	NA	NA	NA	NA	NA	NA	0	0	NA	5	0	0	0	1	0	0.4	NaN	NaN	NaN	1	NaN	Y	CI overlap
H158	unk			20190729	SP	w	7	0.409137			4	0	0	1	2	0	0.0938162	1	1	0.00229341	0.0175906	1	172007	91952.3	1	0	0	NA	4	0	0	0	0	0	0.5	NaN	NaN	NaN	NaN	NaN	NA
H70	H070	OR666887		20190610	TP	w	8	0.961122			4	2	2	0.603926	0	0	0.603926	1	2	0.000990348	0.00441153	0.666667	203689	158393	1	0	0	NA	0	0	0	0	0	0	NaN	NaN	NaN	NaN	NaN	NaN	NA
H96	unk			20190617	SP	w	11	0.00960974	N		4	2	0	0.315614	0	0	0.088508	1	0	NA	NA	NA	NA	NA	NA	0	0	NA	0	0	0	0	0	0	NaN	NaN	NaN	NaN	NaN	NaN	NA
P107	P107	OR666895		20190610	TP	w	177	8.42317e-15	N		4	0	0	0.950528	4	4	0.950528	26	23	0.000377625	0.00443077	3.42798e-14	82448	36087	7.07289e-05	0	0	NA	61	0	27	0	0	0	0.377049	NaN	0.777778	NaN	NaN	NaN	Y	CI don't overlap
P112	P112	OR666896	excluded due to issues with photo labeling	20190624	WR	w	156
P113	P113	OR666897		20190624	WR	w	244	4.73587e-19	Y	6-6.5	2	0	0	1	0	0	1	112	21	0.00134436	0.0206396	7.00366e-13	38792.4	14137.2	3.92154e-08	33	201	0.141026	0	0	0	0	0	0	NaN	NaN	NaN	NaN	NaN	NaN	NA								0
P115	P115	OR666898		20190624	WR	w	325	7.37264e-16	N		3	0	2	0.83051	4	2	0.327918	28	27	0.000390785	0.00127052	3.83752e-12	22449.3	18816.6	0.151016	0	0	NA	84	0	78	0	0	0	0.75	NaN	0.230769	NaN	NaN	NaN	N	CI don't overlap							0
P116	P115	OR666899		20190624	WR	w	272	3.65963e-17	Y	6.2-6.6	4	0	3	0.989539	3	3	0.332195	193	7	0.000550932	0.00917155	8.43274e-06	24429	9202.77	0.0225372	9	261	0.0333333	172	0	96	0	4	0	0.0232558	NaN	0.0416667	NaN	0.75	NaN	Y	CI don't overlap							0
P117	P115	OR666900		20190624	WR	w	182	1.09906e-12	N		4	3	2	0.163693	4	2	0.00797671	34	26	0.000287326	0.00130291	3.9779e-15	18816.6	18816.6	0.898379	0	0	NA	26	0	57	0	9	0	0.538462	NaN	0.45614	NaN	0.666667	NaN	Y	CI overlap							0
P119	P112	OR666901		20190624	WR	w	100	3.63246e-11	Y	7-7.2	3	4	0	0.00998223	4	0	0.020988	29	7	0.000387644	0.00319084	1.67711e-06	24429	11494	0.00153764	13	85	0.132653	78	0	22	0	0	0	0.179487	NaN	0.0454546	NaN	NaN	NaN	N	CI overlap							0
P120	P113	OR666902		20190624	WR	w	160	7.1926e-11	Y	5.5-6	2	0	0	0.950528	0	2	0.98191	9	17	0.00127606	0.0228436	6.40092e-07	22449.3	3591.36	4.53698e-05	26	129	0.167742	143	0	12	0	5	0	0.125874	NaN	0.833333	NaN	0.6	NaN	N	mid and gonad do not overlap							0
P121	P112	OR666903		20190624	WR	w	95	3.11444e-11	N		3	2	2	0.667805	2	1	0.020988	5	6	0.000787582	0.00223927	0.017316	33510.3	23439.2	0.116457	0	0	NA	43	0	3	0	2	0	0.44186	NaN	1	NaN	1	NaN	Y	CI overlap							2
P122	P112	OR666904		20190624	WR	w	145	4.26327e-06	N		3	0	1	0.783076	3	1	0.0212817	8	13	0.000829077	0.00261081	0.000186741	61600.9	31059.4	0.00645461	0	0	NA	45	0	27	0	0	0	0.555556	NaN	0.407407	NaN	NaN	NaN	N	CI overlap							0
P125	P112	OR666905		20190624	WR	w	146	5.09372e-06	N		3	1	4	0.949826	3	4	0.967664	10	9	0.000687895	0.00148457	0.000411353	71539	38792.4	0.00994824	0	0	NA	36	0	26	0	0	12	0.611111	NaN	0.576923	NaN	NaN	0	N	CI overlap							0
P126	P112	OR666906		20190624	WR	w	189	6.13133e-12	Y	6-6.4	4	1	1	0.628784	3	4	0.929767	44	12	0.00166363	0.0237052	3.58177e-12	41629.8	17986.9	4.32592e-05	19	166	0.102703	107	0	62	0	1	19	0.0280374	NaN	0.274194	NaN	1	0.105263	Y	gonad and mid don't overlap							0
P128	P112	OR666907		20190624	WR	w	103	8.57356e-09	Y	6-6.5	2	1	1	0.547198	3	4	0.99866	12	3	0.00144962	0.00927536	0.00879121	41697.3	9202.77	0.0137103	8	93	0.0792079	47	0	46	0	0	10	0	NaN	0.217391	NaN	NaN	0	Y	CI don't overlap							0
P130	P113	OR666908		20190624	WR	w	97	5.10505e-07	Y	6	2	0	0	0.949475	0	0	0.949475	6	31	0.00654787	0.0567288	8.60295e-07	17358.3	11494	0.15864	42	55	0.43299	59	0	33	0	5	0	0.0677966	NaN	1	NaN	1	NaN	Y	gonad doesn't overlap with mid or foot							0
P131	P112	OR666909		20190624	WR	w	139	2.52356e-09	Y	7.1-7.2	4	2	1	0.258952	2	3	0.414948	14	1	0.00206944	0.00421762	0.133333	61600.9	50965	0.558947	6	132	0.0434783	135	0	4	0	0	0	0.0444444	NaN	0.25	NaN	NaN	NaN	Y	CI overlap							0
P135	unk			20190624	WR	w	89	1.41887e-09	N		2	0	2	0.998233	1	2	0.981299	9	6	0.000968938	0.0269013	0.0003996	87113.8	38792.4	0.00175613	0	0	NA	29	0	15	0	0	0	0.517241	NaN	0.466667	NaN	NaN	NaN	N	CI overlap							0
P136	P113	OR666910		20190624	WR	w	149	3.20575e-11	Y	5.5-6	3	0	0	1	0	0	1	7	30	0.0052015	0.0441141	1.9426e-07	57905.8	8181.23	5.47385e-05	38	105	0.265734	116	0	23	0	4	0	0.0948276	NaN	1	NaN	1	NaN	Y	gonad doesn't overlap with mid or foot
P137	P112	OR666911		20190624	WR	w	161	6.79381e-17	Y	6.2-6.8	2	0	1	0.783076	3	3	0.740698	18	3	0.00196716	0.0399157	0.00150376	80199.9	26521.8	0.0102083	8	153	0.0496894	90	0	68	0	2	0	0	NaN	0.0882353	NaN	1	NaN	Y	foot doesn't overlap with gonad (mid overlaps both)							0
P139	unk			20190624	WR	w	92	0.000270875	N		4	1	0	0.00998223	1	0	0.00998223	6	7	0.000813974	0.00234301	0.002331	32408.9	15598.5	0.017937	0	0	NA	46	0	0	0	0	0	0.5	NaN	NaN	NaN	NaN	NaN	NA
P140	P115	OR666912		20190624	WR	w	132	1.11916e-10	N		3	0	2	0.90347	3	2	0.457092	4	5	0.00153634	0.00471713	0.015873	75787	61600.9	0.460558	0	0	NA	0	0	0	0	0	66	NaN	NaN	NaN	NaN	NaN	0.5	NA
P141	P141	OR666913		20190624	WR	w	128	0.000125087	N		4	0	0	1	0	0	1	20	30	0.00159447	0.0101849	4.24365e-14	31059.4	28730.9	0.0135166	0	0	NA	43	0	19	0	2	0	0.302326	NaN	0.894737	NaN	1	NaN	Y	mid and gonad do not overlap
P150	P150	OR666914		20190708	SP	w	28	2.00078e-08	Y	6.5-7.5	4	0	0	1	0	0	0.088508	15	2	0.000369547	0.0188133	0.0147059	54361.6	34798.6	0.0360816	2	26	0.0714286	26	0	2	0	0	0	0.0769231	NaN	0	NaN	NaN	NaN	N	CI overlap							0
P152	P107	OR666915		20190729	SP	w	137	5.22576e-14	Y	6.8-7.2	4	3	0	0.114104	4	3	0.186374	21	17	0.00141521	0.0180263	6.94899e-11	44602.2	47712.9	0.424404	17	118	0.125926	137	0	0	0	0	0	0.138686	NaN	NaN	NaN	NaN	NaN	NA								1
P153	P153	OR666916		20190729	SP	w	56	4.59612e-08	Y	6.8-7	3	2	0	0.408681	2	0	0.0124042	36	5	0.00418395	0.0243859	0.000400321	134091	38792.4	0.00060545	8	48	0.142857	53	0	3	0	0	0	0.132075	NaN	0.333333	NaN	NaN	NaN	Y	CI overlap							0
P154	P112b	OR666917		20190805	WR	s	52	0.000451379	N		4	2	2	0.628784	4	2	0.159647	6	5	0.000278777	0.00450161	0.004329	38858.4	31059.4	0.464192	0	0	NA	10	0	16	0	0	0	0.8	NaN	0.3125	NaN	NaN	NaN	N	CI overlap
P155	P112b	OR666918		20190805	WR	s	51	5.40929e-08	Y	6.5-7	3	0	0	0.740698	0	4	0.764238	9	6	0.00060126	0.0125708	0.000799201	22449.3	19698	0.0741982	12	38	0.24	38	0	13	0	0	0	0.184211	NaN	0.461538	NaN	NaN	NaN	Y	CI overlap	0.02975	0.0585	0.0821176	0.0537057	0.0439173	0.90773
P157	P113	OR666919		20190805	WR	s	69	0.00106594	N		2	0	0	1	0	0	1	6	4	0.00189491	0.0167719	0.00952381	16377.9	10475.6	0.106583	0	0	NA	34	0	0	0	0	0	0.5	NaN	NaN	NaN	NaN	NaN	NA
P160	P112b	OR666920		20190805	WR	s	67	5.39036e-11	N		4	0	4	0.989539	2	3	0.836307	10	6	0.00085429	0.0028901	0.00024975	43116	38858.4	1	0	0	NA	22	0	12	0	0	0	0.363636	NaN	0.75	NaN	NaN	NaN	Y	CI overlap	0.0355	0.1015	0.0289044	0.0468647	0.0731433	0.151981
P162	P112	OR666921		20190805	WR	s	193	2.0958e-21	N		4	2	0	0.136661	3	3	0.858971	13	7	0.00170444	0.00317121	0.0674923	54361.6	33510.3	0.00682079	0	0	NA	65	0	31	0	0	0	0.446154	NaN	0.612903	NaN	NaN	NaN	Y	CI overlap	0.053	0.14575	0.151981	0.0686973	0.128924	0.463403
P163	P112	OR666922		20190805	WR	s	127	2.73629e-13	N		3	0	2	0.87158	0	0	0.640041	7	5	0.00116445	0.00129678	0.267677	44602.2	26521.8	0.0870462	0	0	NA	55	0	8	0	1	0	0.545455	NaN	0.25	NaN	0	NaN	N	CI overlap	0.104	0.14225	0.544759	0.152127	0.124121	0.492022	0
P164	P112	OR666923		20190805	WR	s	103	1.76766e-07	N		4	2	0	0.00279181	2	4	0.83051	3	1	0.00145553	0.00242175	0.5	65449.8	36087	0.5	0	0	NA	44	0	7	0	1	0	0.568182	NaN	0.142857	NaN	0	NaN	N	CI overlap	0.018	0.02575	0.636254	0.0313502	0.016995	0.712989
P165	P112b	OR666924		20190805	WR	s	97	1.95351e-10	N		4	0	0	0.349268	0	4	0.958368	5	3	0.00107128	0.00130204	0.25	65449.8	41629.8	0.392857	0	0	NA	40	0	8	0	0	0	0.525	NaN	0.375	NaN	NaN	NaN	N	CI overlap	0.105	0.19	0.25	0.0865266	0.120942	0.392857
P166	P113	OR666925		20190805	WR	s	123	7.94571e-10	Y	5.5-6	2	0	0	1	0	0	1	18	8	0.00632674	0.0275598	2.56037e-06	20579.5	12952.3	0.0274257	18	97	0.156522	0	0	0	0	0	123	NaN	NaN	NaN	NaN	NaN	0.211382	NA
P170	P112	OR666926		20190805	WR	s	160	1.88642e-09	N		4	0	0	0.559618	4	0	0.03532	0	2	NA	NA	NA	NA	NA	NA	0	0	NA	68	0	12	0	0	0	0.544118	NaN	0.25	NaN	NaN	NaN	N	CI overlap	0.01325	0.06975	0.214141	0.0282712	0.059469	0.569697
P177	P177	OR666927		20210608	NMP	s	98	2.87888e-11	Y	6.5-7	2	2	3	0.972571	4	4	0.783945	78	17	0.00644459	0.0884131	2.28669e-09	500427	124788	1.58129e-09	17	80	0.175258	0	0	0	0	0	98	NaN	NaN	NaN	NaN	NaN	0.183673	NA
P178	P177	OR666928		20210608	NMP	s	145	1.29183e-11	Y	6.4-6.6	2	2	0	0.0416323	2	2	0.221597	92	8	0.00957651	0.0916928	7.0761e-06	234444	125178	0.00293081	8	135	0.0559441	0	0	0	0	0	145	NaN	NaN	NaN	NaN	NaN	0.0689655	NA
Ph100	Ph100	OR666931		20190708	SP	w	38	4.13459e-06	N		2	0	0	0.211855	0	0	0.211855	5	3	0.00308667	0.00877178	0.142857	124788	157479	1	0	0	NA	0	0	0	0	0	20	NaN	NaN	NaN	NaN	NaN	0.5	NA
Ph107	Ph095	OR666932		20190708	SP	w	107	0.000200282	N		3	0	0	1	0	0	1	25	26	0.00961603	0.00954248	0.471484	369121	110317	1.2719e-09	0	0	NA	53	0	0	1	0	0	0.509434	NaN	NaN	0	NaN	NaN	N	CI overlap							0
Ph109	Ph095	OR666933		20190708	SP	w	53	0.0173499	N		3	0	0	0.211855	0	0	0.211855	12	8	0.00286963	0.00634276	0.000190522	258155	63525.4	0.000674376	0	0	NA	0	0	0	0	0	26	NaN	NaN	NaN	NaN	NaN	0.5	NA
Ph112	Ph095	OR666934		20190708	SP	w	29	0.440681			2	0	0	0.211855	0	0	0.211855	2	3	0.00351714	0.0104884	0.2	172115	50965	0.2	0	0	NA	7	0	0	7	0	0	0.571429	NaN	NaN	0.428571	NaN	NaN	N	CI overlap
Ph114	Ph114	OR666935	excluded due to apparent mixed infection	20190708	SP	w	103	0.000577789	N		3	0	0	1	0	0	1	24	21	0.00727936	0.0125909	4.53949e-05	278262	124788	1.84457e-06	0	0	NA	37	15	0	0	0	0	0.486486	0.533333	NaN	NaN	NaN	NaN	Y	CI overlap
Ph115	unk			20190725	TP	w	55	0.00013404	N		2	1	4	0.995031	3	4	0.952665	4	1	0.00370404	0.0401061	0.4	520644	69455.9	0.4	0	0	NA	0	0	0	0	0	28	NaN	NaN	NaN	NaN	NaN	0.5	NA
Ph116	Ph116	OR666936		20190729	SP	w	96	8.12539e-07	Y	6-6.5	3	3	0	0.00374748	4	0	0.00279181	59	21	0.00285055	0.0268193	1.89371e-11	65449.8	22449.3	2.90983e-09	16	73	0.179775	53	0	0	0	2	41	0.358491	NaN	NaN	NaN	0.5	0.0731707	Y	CI overlap
Ph126	P115	OR666937		20190805	WR	s	101	7.10762e-08	Y	6.4-6.6	2	0	0	0.617203	4	4	0.617203	60	10	0.00163427	0.013244	4.99002e-07	28730.9	14867.8	0.00548697	12	88	0.12	0	0	0	0	0	101	NaN	NaN	NaN	NaN	NaN	0.128713	NA
Ph159	Ph159	OR666938		20190805	WR	s	55	4.83876e-05	N		4	3	3	0.978097	3	4	0.980566	14	11	0.00212693	0.00512929	3.14084e-06	157479	137258	0.474271	0	0	NA	0	0	0	0	0	28	NaN	NaN	NaN	NaN	NaN	0.5	NA
Ph95	Ph095	OR666929		20190617	SP	w	102	3.64961e-11	Y	6.8-7	3	1	0	0.0353506	1	0	0.0353506	87	3	0.0036297	0.0075176	0.0152	356818	38792.4	0.00545934	8	94	0.0784314	78	0	13	0	11	0	0	NaN	0.230769	NaN	0.454545	NaN	Y	gonad doesn't overlap with mid or foot
Ph96	Ph096	OR666930		20190617	SP	w	71	2.13384e-05	N		3	3	3	0.211855	3	3	0.12842	16	14	0.000459744	0.00965544	1.3753e-08	69536	37439.7	4.13828e-06	0	0	NA	0	0	0	0	0	36	NaN	NaN	NaN	NaN	NaN	0.5	NA
V141	V141	OR666939		20190521	TP	w	43	0.0924501			4	0	3	0.822195	3	4	0.83051	10	6	0.00149408	0.00931514	0.00749251	47712.9	54361.6	0.58482	0	0	NA	0	0	0	0	0	0	NaN	NaN	NaN	NaN	NaN	NaN	NA
V159	V141	OR666940		20191022	NMP	s	84	2.12157e-10	N		3	0	3	0.985505	2	4	0.998233	8	7	0.0036549	0.00693245	0.013986	65449.8	44602.2	0.0269186	0	0	NA	42	0	0	0	0	0	0.5	NaN	NaN	NaN	NaN	NaN	NA		0.005	0.0485	0.0216164	0.0161765	0.0883691	0.135911	2
V168	V141	OR666941		20210608	NMP	s	114	1.23399e-06	N		3	0	0	0.88493	4	3	0.589702	27	27	0.00509847	0.0131261	3.60155e-12	130924	102160	0.00126928	0	0	NA	0	0	0	0	0	58	NaN	NaN	NaN	NaN	NaN	0.5	NA
V172	V172	OR666942		20210608	NMP	s	13	0.00228327	N		2	3	4	0.842848	4	4	0.696382	3	3	0.00633981	0.0109806	0.7	195432	69455.9	0.1	0	0	NA	0	0	0	0	0	6	NaN	NaN	NaN	NaN	NaN	0.5	NA
V182	V141	OR666943		20210608	NMP	s	79	0.00715091	N		3	3	0	0.0568463	3	3	0.190418	19	19	0.00626679	0.0140096	0.011865	268083	82448	9.24167e-07	0	0	NA	0	0	0	0	0	40	NaN	NaN	NaN	NaN	NaN	0.5	NA
V183	V141	OR666944		20210608	NMP	s	71	0.00190807	N		3	0	4	0.98191	4	4	1	17	15	0.00449983	0.0192446	3.5353e-09	157479	82448	7.32791e-06	0	0	NA	0	0	0	0	0	36	NaN	NaN	NaN	NaN	NaN	0.5	NA
V184	V141	OR666945		20210608	NMP	s	179	3.34939e-08	N		3	0	3	0.972571	4	4	0.816922	43	41	0.0029451	0.00864072	3.25911e-13	102160	73622.2	7.73002e-05	0	0	NA	0	0	0	0	0	90	NaN	NaN	NaN	NaN	NaN	0.5	NA
[truncated: 5 more columns]
